# Supplementary material for: Aromadendrin Protects Neuronal Cells from Methamphetamine-Induced Neurotoxicity by Regulating Endoplasmic Reticulum Stress and PI3K/Akt/mTOR Signaling Pathway
Source: PubMed Central journal article supplement (PMC7956189; doi:10.3390/ijms22052274), 2021-02-25
Supplement: ijms-22-02274-s001.pdf [file ijms-22-02274-s001.pdf]

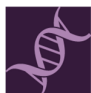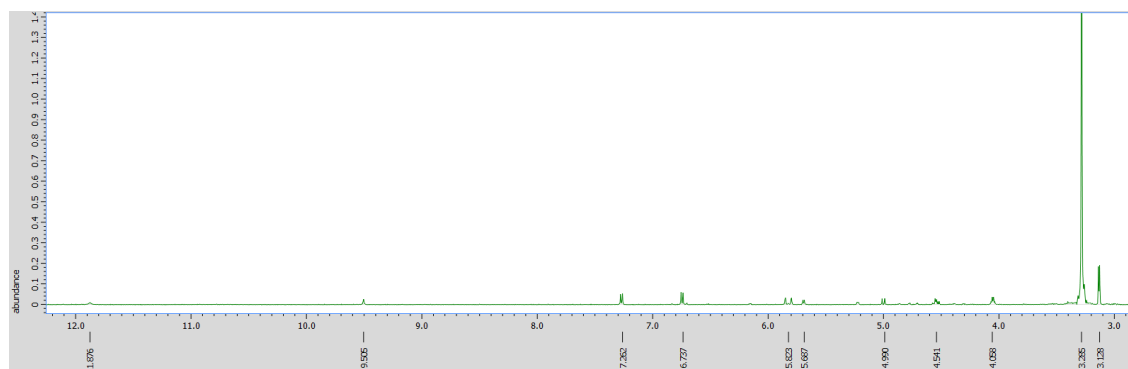

**Figure S1.**  $^1\text{H}$ -NMR spectra of aromadendrin (500 MHz,  $\text{DMSO-}d_6$ ). Aromadendrin  $^1\text{H}$ -NMR (500 MHz,  $\text{DMSO-}d_6$ )  $\delta$  : 4.54 (1H, brdd,  $J$ = 11.4, 3.8 Hz, H-3), 4.99 (1H, d,  $J$ = 11.4 Hz, H-2), 5.69 (1H, d,  $J$ = 2.2 Hz, H-6), 5.82 (1H, d,  $J$ = 2.2 Hz, H-8), 6.74 (2H, d,  $J$ = 8.8 Hz, H-3', 5'), 7.26 (2H, d,  $J$ = 8.8 Hz, H-2', 6'), 9.51 (1H, s, 7-OH), 11.88 (1H, s, 5-OH).
